# Supplementary material for: Effects of nanobubble water on the growth of Lactobacillus acidophilus 1028 and its lactic acid production
Source: PubMed Central journal article supplement — RSC Adv. 2019 Sep 30;9(53):30760–7. doi: 10.1039/c9ra05868k (PMC9072192; doi:10.1039/c9ra05868k), 2019-09-30
Supplement: RA-009-C9RA05868K-s001.pdf [file RA-009-C9RA05868K-s001.pdf]

## Supplementary Information

### **Effects of nanobubble water on the growth of *Lactobacillus acidophilus* 1028 and its lactic acid production**

Zitao Guo <sup>a</sup>, Xuezhi Wang <sup>a</sup>, Hanxiao Wang <sup>a</sup>, Bo Hu <sup>b</sup>, Zhongfang Lei <sup>a</sup>, Motoyoshi Kobayashi <sup>a</sup>, Yasuhisa Adachi <sup>a</sup>, Kazuya Shimizu <sup>a</sup>, and Zhenya Zhang <sup>\*a</sup>

<sup>a</sup> Graduate School of Life and Environmental Sciences, University of Tsukuba, 1-1-1 Tennodai, Tsukuba, Ibaraki 305-8572, Japan.

<sup>b</sup> National Engineering Research Centre for Functional Food, Jiangnan University, Wuxi 214122, China

\*Corresponding author

E-mail: [zhang.zhenya.fu@u.tsukuba.ac.jp](mailto:zhang.zhenya.fu@u.tsukuba.ac.jp)

## 1. Medium composition

|                                                                      |      |    |
|----------------------------------------------------------------------|------|----|
| Casein peptone, tryptic digest                                       | 10.0 | g  |
| Beef extract                                                         | 10.0 | g  |
| Yeast extract                                                        | 5.0  | g  |
| Glucose                                                              | 20.0 | g  |
| Tween 80                                                             | 1.0  | g  |
| K <sub>2</sub> HPO <sub>4</sub>                                      | 1.0  | g  |
| Sodium acetate                                                       | 5.0  | g  |
| Diammonium citrate                                                   | 2.0  | g  |
| MgSO <sub>4</sub> ·7H <sub>2</sub> O                                 | 0.2  | g  |
| MnSO <sub>4</sub> ·5H <sub>2</sub> O                                 | 50.0 | mg |
| Distilled water                                                      | 1.0  | L  |
| Adjust the pH to 6.5. Sterilize by autoclaving at 121 °C for 15 min. |      |    |
| Add 15g agar in 1L medium to get the MRS agar medium.                |      |    |

**Table S1** The composition of MRS medium

The fermentation medium was the same as MRS medium except the glucose concentration was 10g/L. Casein peptone, beef extract, and yeast extract were purchased from BD Biosciences, and all the other reagents were obtained from Wako Pure Chemical Industries, Ltd.

## 2. The MRS medium ionic strength calculation

The ionic strength equation (Eq. (S.1)) as described elsewhere. <sup>1</sup>

$$I = \frac{1}{2} \sum_{i=1}^n c_i z_i^2 \quad (S.1)$$

where  $I$  (mM) is the solution ionic strength,  $C_i$  (mM) is the molar concentration of ion,  $Z_i$  the charge of the ion. The MRS medium ionic strength value was calculated equal to 177.628 mM, between the ionic strength of the 50mM  $\text{CaCl}_2$  and 300 mM  $\text{NaCl}$  in the experiment.<sup>2</sup>

### References:

1. Y. K. Yang, N. Nakada, R. Nakajima, M. Yasojima, C. Wang and H. Tanaka, *Journal of Hazardous Materials*, 2013, **244**, 582-587.
2. A. K. A. Ahmed, C. Z. Sun, L. K. Hua, Z. B. Zhang, Y. H. Zhang, T. Marhaba and W. Zhang, *Environmental Engineering Science*, 2018, **35**, 720-727.
